# Supplementary material for: Effects of adding low-dose esketamine to sufentanil and propofol sedation during cervical conization: a single-centre, randomized controlled trial
Source: Springer Nature journal article supplement (doi:10.1186/s12871-023-02389-2), 2024-01-04
Supplement: MOESM1 [file 26595786]

## World SIVA adverse sedation event reporting toll

**Step 1: Was there one or more adverse events associated with this sedation encounter?**

No, this form is now complete.  Yes, fill out remainder of form below.

**Step 2: Please DESCRIBE the event(s). Check all that apply.**

| Minimal risk descriptors                                    | Minor risk descriptors                                                 | Sentinel risk descriptors                                                                                           |
|-------------------------------------------------------------|------------------------------------------------------------------------|---------------------------------------------------------------------------------------------------------------------|
| <input type="checkbox"/> <u>Vomiting/Retching</u>           | <input type="checkbox"/> <u>Oxygen desaturation(75-90%) for 30~60s</u> | <input type="checkbox"/> <u>Oxygen desaturation, severe(&lt;75% at any time) or prolonged(&lt;90% for &gt; 60s)</u> |
| <input type="checkbox"/> Subclinical respiratory depression | <input type="checkbox"/> <u>Apnoea, not prolonged (30~60s)</u>         | <input type="checkbox"/> <u>Apnoea, prolonged(&gt;60s)</u>                                                          |
| <input type="checkbox"/> Muscle rigidity, myoclonus         | <input type="checkbox"/> <u>Airway obstruction</u>                     | <input type="checkbox"/> Cardiovascular collapse/ shock                                                             |
| <input type="checkbox"/> <u>Hypersalivation</u>             | <input type="checkbox"/> Failed sedation                               | <input type="checkbox"/> Cardiovascular arrest/ absent pulse                                                        |
| <input type="checkbox"/> Paradoxical response               | <input type="checkbox"/> Allergic reaction without anaphylaxis         |                                                                                                                     |
| <input type="checkbox"/> Recovery agitation                 | <input type="checkbox"/> <u>Bradycardia (&gt; 25%Baseline)</u>         |                                                                                                                     |
| <input type="checkbox"/> Prolonged recovery                 | <input type="checkbox"/> <u>Tachycardia (&gt; 25%Baseline)</u>         |                                                                                                                     |
|                                                             | <input type="checkbox"/> <u>Hypotension (&gt; 25%Baseline)</u>         |                                                                                                                     |
|                                                             | <input type="checkbox"/> <u>Hypertension (&gt; 25%Baseline)</u>        |                                                                                                                     |
|                                                             | <input type="checkbox"/> Seizure                                       |                                                                                                                     |

**Step 3: Please note the INTERVENTIONS performed to treat the adverse event(s). Check all the apply.**

| Minimal risk                                       | Minor risk                                                            | Moderate risk                                                       | Sentinel intervention                                         |
|----------------------------------------------------|-----------------------------------------------------------------------|---------------------------------------------------------------------|---------------------------------------------------------------|
| <input type="checkbox"/> No intervention performed | <input type="checkbox"/> <u>Airway repositioning</u>                  | <input type="checkbox"/> <u>Bag valve mask-assisted ventilation</u> | <input type="checkbox"/> Chest compressions                   |
| Administration of:                                 | <input type="checkbox"/> Tactile stimulation                          | <input type="checkbox"/> <u>Laryngeal airway</u>                    | <input type="checkbox"/> Tracheal intubation                  |
| <input type="checkbox"/> Additional sedatives      | Administration of:                                                    | <input type="checkbox"/> <u>Oral/nasal airway</u>                   | Administration of:                                            |
| <input type="checkbox"/> Antiemetic                | <input type="checkbox"/> <u>Supplemental oxygen, new or increased</u> | <input type="checkbox"/> CPAP                                       | <input type="checkbox"/> Neuromuscular block                  |
| <input type="checkbox"/> Antihistamine             | <input type="checkbox"/> Antisialagogue                               | Administration of:                                                  | <input type="checkbox"/> <u>Pressor/ epinephrin:</u>          |
|                                                    |                                                                       | <input type="checkbox"/> Reversal agents                            | <input type="checkbox"/> <u>Atropine to treat bradycardia</u> |
|                                                    |                                                                       | <input type="checkbox"/> Rapid i.v. fluids                          |                                                               |
|                                                    |                                                                       | <input type="checkbox"/> Anticonvulsant i.v.                        |                                                               |

**Step 4: Please note the OUTCOME of the adverse event (s). Check all the apply.**

| Minimal risk outcome                        | Moderate risk outcome                                                    | Sentinel outcome                                        |
|---------------------------------------------|--------------------------------------------------------------------------|---------------------------------------------------------|
| <input type="checkbox"/> No adverse outcome | <input type="checkbox"/> Unplanned hospitalization or escalation of care | <input type="checkbox"/> Death                          |
|                                             |                                                                          | <input type="checkbox"/> Permanent neurological deficit |
|                                             |                                                                          | <input type="checkbox"/> Pulmonary aspiration syndrome  |

**Step 5: Assign a SEVERITY rating to the adverse event(s) associated with this sedation encounter.**

Sentinel  Moderate  Minor  Minimal

Doctor: \_\_\_\_\_
